# Supplementary material
Source: PubMed Central journal article supplement (PMC4179606)
Supplement: CIN-Suppl.2-2014-039-s001.pdf [file CIN-Suppl.2-2014-039-s001.pdf]

# Supplementary Materials for Integrative Bayesian Network Analysis of Genomic Data

Yang Ni<sup>1</sup>, Francesco C. Stingo<sup>2</sup>, and Veerabhadran Baladandayuthapani<sup>2</sup>

<sup>1</sup>Department of Statistics, Rice University, Houston, Texas

<sup>2</sup>Department of Biostatistics, The University of Texas MD Anderson Cancer  
Center, Houston, Texas

In this supplementary file, we tabulate the simulation results for all combinations of regression coefficients in Tables 1-12. For each set of coefficients, we list its corresponding median correlation complexity and Frobenius norm complexity defined in the main text. This provides a detailed connection between the complexity measures and the regression coefficients. To summarize the performance, we calculate the percentage of correctly selected models (PCM), the percentage of incorrectly selected models (PIM) and the true positive rate (TPR).

Tab. 1: Simulation results for scenario 1. We calculate the percentage of correctly selected models (PCM), the percentage of incorrectly selected models (PIM) and the true positive rate (TPR).

| $(a, b, c)$      | MCC  | FNC  | PCM  | PIM  | TPR  |
|------------------|------|------|------|------|------|
| (-0.4,-0.4,-0.4) | 0.15 | 0.08 | 0.86 | 0.01 | 1    |
| (-0.4,-0.4,-0.2) | 0.28 | 0.23 | 0.86 | 0.01 | 1    |
| (-0.4,-0.4,-0.1) | 0.43 | 0.36 | 0.47 | 0.11 | 0.91 |
| (-0.4,-0.4,0.1)  | 0.52 | 0.46 | 0.44 | 0.12 | 0.91 |
| (-0.4,-0.4,0.2)  | 0.34 | 0.31 | 0.86 | 0.01 | 1    |
| (-0.4,-0.4,0.4)  | 0.05 | 0.09 | 0.86 | 0.01 | 1    |
| (-0.4,-0.2,-0.4) | 0.66 | 0.22 | 0.85 | 0.01 | 1    |
| (-0.4,-0.2,-0.2) | 0.52 | 0.32 | 0.84 | 0.01 | 1    |
| (-0.4,-0.2,-0.1) | 0.55 | 0.43 | 0.48 | 0.1  | 0.91 |
| (-0.4,-0.2,0.1)  | 0.74 | 0.57 | 0.46 | 0.12 | 0.91 |
| (-0.4,-0.2,0.2)  | 0.52 | 0.4  | 0.84 | 0.01 | 1    |
| (-0.4,-0.2,0.4)  | 0.4  | 0.18 | 0.85 | 0.01 | 1    |
| (-0.4,-0.1,-0.4) | 0.93 | 0.36 | 0.42 | 0.12 | 0.89 |
| (-0.4,-0.1,-0.2) | 0.86 | 0.44 | 0.43 | 0.11 | 0.89 |
| (-0.4,-0.1,-0.1) | 0.81 | 0.54 | 0.26 | 0.12 | 0.81 |
| (-0.4,-0.1,0.1)  | 0.89 | 0.7  | 0.24 | 0.12 | 0.81 |
| (-0.4,-0.1,0.2)  | 0.71 | 0.53 | 0.43 | 0.11 | 0.9  |
| (-0.4,-0.1,0.4)  | 0.71 | 0.31 | 0.42 | 0.12 | 0.89 |
| (-0.4,0.1,-0.4)  | 0.77 | 0.24 | 0.43 | 0.12 | 0.89 |
| (-0.4,0.1,-0.2)  | 0.75 | 0.36 | 0.44 | 0.12 | 0.89 |
| (-0.4,0.1,-0.1)  | 0.76 | 0.48 | 0.26 | 0.14 | 0.81 |
| (-0.4,0.1,0.1)   | 0.93 | 0.74 | 0.24 | 0.13 | 0.81 |
| (-0.4,0.1,0.2)   | 0.84 | 0.59 | 0.44 | 0.12 | 0.89 |
| (-0.4,0.1,0.4)   | 0.91 | 0.41 | 0.43 | 0.12 | 0.89 |
| (-0.4,0.2,-0.4)  | 0.48 | 0.12 | 0.85 | 0.01 | 1    |
| (-0.4,0.2,-0.2)  | 0.42 | 0.24 | 0.84 | 0.01 | 1    |
| (-0.4,0.2,-0.1)  | 0.48 | 0.35 | 0.48 | 0.1  | 0.91 |
| (-0.4,0.2,0.1)   | 0.79 | 0.64 | 0.46 | 0.12 | 0.91 |
| (-0.4,0.2,0.2)   | 0.65 | 0.47 | 0.84 | 0.01 | 1    |
| (-0.4,0.2,0.4)   | 0.6  | 0.27 | 0.85 | 0.01 | 1    |
| (-0.4,0.4,-0.4)  | 0.02 | 0    | 0.86 | 0.01 | 1    |
| (-0.4,0.4,-0.2)  | 0.16 | 0.14 | 0.86 | 0.01 | 1    |
| (-0.4,0.4,-0.1)  | 0.31 | 0.25 | 0.47 | 0.11 | 0.91 |
| (-0.4,0.4,0.1)   | 0.58 | 0.57 | 0.44 | 0.12 | 0.91 |
| (-0.4,0.4,0.2)   | 0.51 | 0.4  | 0.86 | 0.01 | 1    |
| (-0.4,0.4,0.4)   | 0.21 | 0.16 | 0.86 | 0.01 | 1    |
| (-0.2,-0.4,-0.4) | 0.46 | 0.24 | 0.86 | 0.01 | 1    |
| (-0.2,-0.4,-0.2) | 0.46 | 0.37 | 0.85 | 0.01 | 1    |
| (-0.2,-0.4,-0.1) | 0.62 | 0.48 | 0.47 | 0.11 | 0.91 |
| (-0.2,-0.4,0.1)  | 0.73 | 0.56 | 0.44 | 0.12 | 0.91 |
| (-0.2,-0.4,0.2)  | 0.54 | 0.42 | 0.85 | 0.01 | 1    |
| (-0.2,-0.4,0.4)  | 0.4  | 0.23 | 0.86 | 0.01 | 1    |
| (-0.2,-0.2,-0.4) | 0.74 | 0.4  | 0.85 | 0.01 | 1    |
| (-0.2,-0.2,-0.2) | 0.62 | 0.48 | 0.84 | 0.01 | 1    |
| (-0.2,-0.2,-0.1) | 0.66 | 0.57 | 0.48 | 0.1  | 0.91 |
| (-0.2,-0.2,0.1)  | 0.86 | 0.7  | 0.45 | 0.12 | 0.91 |
| (-0.2,-0.2,0.2)  | 0.64 | 0.55 | 0.84 | 0.01 | 1    |
| (-0.2,-0.2,0.4)  | 0.52 | 0.35 | 0.85 | 0.01 | 1    |
| (-0.2,-0.1,-0.4) | 0.93 | 0.52 | 0.44 | 0.11 | 0.9  |
| (-0.2,-0.1,-0.2) | 0.88 | 0.6  | 0.46 | 0.11 | 0.9  |
| (-0.2,-0.1,-0.1) | 0.85 | 0.69 | 0.27 | 0.13 | 0.82 |
| (-0.2,-0.1,0.1)  | 0.95 | 0.84 | 0.26 | 0.12 | 0.82 |
| (-0.2,-0.1,0.2)  | 0.78 | 0.67 | 0.46 | 0.11 | 0.91 |
| (-0.2,-0.1,0.4)  | 0.78 | 0.47 | 0.45 | 0.11 | 0.9  |

Tab. 2: Simulation results for scenario 1 (continued)

| $(a, b, c)$      | MCC  | FNC  | PCM  | PIM  | TPR  |
|------------------|------|------|------|------|------|
| (-0.2,0.1,-0.4)  | 0.81 | 0.42 | 0.45 | 0.12 | 0.9  |
| (-0.2,0.1,-0.2)  | 0.79 | 0.53 | 0.46 | 0.11 | 0.9  |
| (-0.2,0.1,-0.1)  | 0.8  | 0.63 | 0.27 | 0.14 | 0.82 |
| (-0.2,0.1,0.1)   | 0.99 | 0.88 | 0.26 | 0.13 | 0.82 |
| (-0.2,0.1,0.2)   | 0.85 | 0.73 | 0.46 | 0.11 | 0.9  |
| (-0.2,0.1,0.4)   | 0.91 | 0.57 | 0.45 | 0.12 | 0.89 |
| (-0.2,0.2,-0.4)  | 0.59 | 0.3  | 0.85 | 0.01 | 1    |
| (-0.2,0.2,-0.2)  | 0.54 | 0.4  | 0.84 | 0.01 | 1    |
| (-0.2,0.2,-0.1)  | 0.61 | 0.5  | 0.48 | 0.1  | 0.91 |
| (-0.2,0.2,0.1)   | 0.91 | 0.77 | 0.46 | 0.12 | 0.91 |
| (-0.2,0.2,0.2)   | 0.77 | 0.62 | 0.84 | 0.01 | 1    |
| (-0.2,0.2,0.4)   | 0.7  | 0.44 | 0.85 | 0.01 | 1    |
| (-0.2,0.4,-0.4)  | 0.44 | 0.16 | 0.86 | 0.01 | 1    |
| (-0.2,0.4,-0.2)  | 0.42 | 0.27 | 0.85 | 0.01 | 1    |
| (-0.2,0.4,-0.1)  | 0.52 | 0.38 | 0.47 | 0.11 | 0.91 |
| (-0.2,0.4,0.1)   | 0.79 | 0.67 | 0.44 | 0.12 | 0.91 |
| (-0.2,0.4,0.2)   | 0.71 | 0.52 | 0.85 | 0.01 | 1    |
| (-0.2,0.4,0.4)   | 0.46 | 0.31 | 0.86 | 0.01 | 1    |
| (-0.1,-0.4,-0.4) | 0.8  | 0.41 | 0.49 | 0.11 | 0.91 |
| (-0.1,-0.4,-0.2) | 0.78 | 0.51 | 0.49 | 0.11 | 0.91 |
| (-0.1,-0.4,-0.1) | 0.77 | 0.61 | 0.27 | 0.12 | 0.82 |
| (-0.1,-0.4,0.1)  | 0.88 | 0.69 | 0.25 | 0.13 | 0.82 |
| (-0.1,-0.4,0.2)  | 0.76 | 0.56 | 0.49 | 0.11 | 0.91 |
| (-0.1,-0.4,0.4)  | 0.77 | 0.38 | 0.49 | 0.11 | 0.91 |
| (-0.1,-0.2,-0.4) | 0.82 | 0.55 | 0.48 | 0.11 | 0.91 |
| (-0.1,-0.2,-0.2) | 0.82 | 0.63 | 0.48 | 0.11 | 0.91 |
| (-0.1,-0.2,-0.1) | 0.82 | 0.71 | 0.28 | 0.12 | 0.82 |
| (-0.1,-0.2,0.1)  | 0.95 | 0.83 | 0.26 | 0.13 | 0.82 |
| (-0.1,-0.2,0.2)  | 0.82 | 0.68 | 0.48 | 0.11 | 0.91 |
| (-0.1,-0.2,0.4)  | 0.82 | 0.51 | 0.48 | 0.11 | 0.91 |
| (-0.1,-0.1,-0.4) | 0.93 | 0.67 | 0.26 | 0.13 | 0.81 |
| (-0.1,-0.1,-0.2) | 0.88 | 0.74 | 0.27 | 0.13 | 0.82 |
| (-0.1,-0.1,-0.1) | 0.85 | 0.82 | 0.16 | 0.12 | 0.73 |
| (-0.1,-0.1,0.1)  | 0.96 | 0.96 | 0.15 | 0.11 | 0.73 |
| (-0.1,-0.1,0.2)  | 0.82 | 0.81 | 0.27 | 0.13 | 0.82 |
| (-0.1,-0.1,0.4)  | 0.82 | 0.62 | 0.26 | 0.13 | 0.81 |
| (-0.1,0.1,-0.4)  | 0.82 | 0.57 | 0.26 | 0.13 | 0.81 |
| (-0.1,0.1,-0.2)  | 0.82 | 0.67 | 0.27 | 0.12 | 0.81 |
| (-0.1,0.1,-0.1)  | 0.82 | 0.77 | 0.17 | 0.12 | 0.73 |
| (-0.1,0.1,0.1)   | 1    | 1    | 0.15 | 0.12 | 0.73 |
| (-0.1,0.1,0.2)   | 0.85 | 0.87 | 0.27 | 0.12 | 0.81 |
| (-0.1,0.1,0.4)   | 0.91 | 0.71 | 0.26 | 0.13 | 0.81 |
| (-0.1,0.2,-0.4)  | 0.82 | 0.46 | 0.49 | 0.11 | 0.91 |
| (-0.1,0.2,-0.2)  | 0.82 | 0.55 | 0.48 | 0.11 | 0.91 |
| (-0.1,0.2,-0.1)  | 0.82 | 0.65 | 0.28 | 0.12 | 0.82 |
| (-0.1,0.2,0.1)   | 1    | 0.89 | 0.26 | 0.13 | 0.82 |
| (-0.1,0.2,0.2)   | 0.82 | 0.75 | 0.48 | 0.11 | 0.91 |
| (-0.1,0.2,0.4)   | 0.82 | 0.59 | 0.49 | 0.11 | 0.91 |
| (-0.1,0.4,-0.4)  | 0.81 | 0.33 | 0.49 | 0.11 | 0.91 |
| (-0.1,0.4,-0.2)  | 0.8  | 0.43 | 0.49 | 0.11 | 0.91 |
| (-0.1,0.4,-0.1)  | 0.79 | 0.52 | 0.27 | 0.12 | 0.82 |
| (-0.1,0.4,0.1)   | 0.93 | 0.79 | 0.25 | 0.14 | 0.82 |
| (-0.1,0.4,0.2)   | 0.85 | 0.65 | 0.48 | 0.11 | 0.91 |
| (-0.1,0.4,0.4)   | 0.82 | 0.46 | 0.49 | 0.11 | 0.91 |

Tab. 3: Simulation results for scenario 1 (continued)

| $(a, b, c)$     | MCC  | FNC  | PCM  | PIM  | TPR  |
|-----------------|------|------|------|------|------|
| (0.1,-0.4,-0.4) | 0.77 | 0.38 | 0.47 | 0.12 | 0.9  |
| (0.1,-0.4,-0.2) | 0.75 | 0.49 | 0.47 | 0.12 | 0.9  |
| (0.1,-0.4,-0.1) | 0.77 | 0.59 | 0.26 | 0.13 | 0.81 |
| (0.1,-0.4,0.1)  | 0.89 | 0.67 | 0.23 | 0.15 | 0.81 |
| (0.1,-0.4,0.2)  | 0.74 | 0.53 | 0.47 | 0.12 | 0.9  |
| (0.1,-0.4,0.4)  | 0.75 | 0.36 | 0.47 | 0.12 | 0.9  |
| (0.1,-0.2,-0.4) | 0.78 | 0.53 | 0.47 | 0.12 | 0.9  |
| (0.1,-0.2,-0.2) | 0.78 | 0.6  | 0.46 | 0.12 | 0.9  |
| (0.1,-0.2,-0.1) | 0.78 | 0.69 | 0.26 | 0.13 | 0.82 |
| (0.1,-0.2,0.1)  | 0.95 | 0.81 | 0.24 | 0.15 | 0.82 |
| (0.1,-0.2,0.2)  | 0.78 | 0.66 | 0.46 | 0.12 | 0.9  |
| (0.1,-0.2,0.4)  | 0.78 | 0.48 | 0.47 | 0.12 | 0.9  |
| (0.1,-0.1,-0.4) | 0.93 | 0.65 | 0.25 | 0.14 | 0.81 |
| (0.1,-0.1,-0.2) | 0.88 | 0.72 | 0.26 | 0.14 | 0.81 |
| (0.1,-0.1,-0.1) | 0.85 | 0.8  | 0.15 | 0.13 | 0.73 |
| (0.1,-0.1,0.1)  | 0.96 | 0.94 | 0.14 | 0.12 | 0.72 |
| (0.1,-0.1,0.2)  | 0.79 | 0.79 | 0.26 | 0.14 | 0.81 |
| (0.1,-0.1,0.4)  | 0.79 | 0.6  | 0.25 | 0.14 | 0.81 |
| (0.1,0.1,-0.4)  | 0.81 | 0.55 | 0.24 | 0.15 | 0.8  |
| (0.1,0.1,-0.2)  | 0.79 | 0.65 | 0.26 | 0.14 | 0.81 |
| (0.1,0.1,-0.1)  | 0.8  | 0.75 | 0.15 | 0.13 | 0.72 |
| (0.1,0.1,0.1)   | 0.99 | 0.98 | 0.13 | 0.14 | 0.72 |
| (0.1,0.1,0.2)   | 0.85 | 0.85 | 0.25 | 0.14 | 0.81 |
| (0.1,0.1,0.4)   | 0.91 | 0.69 | 0.25 | 0.15 | 0.8  |
| (0.1,0.2,-0.4)  | 0.78 | 0.44 | 0.47 | 0.12 | 0.9  |
| (0.1,0.2,-0.2)  | 0.78 | 0.53 | 0.46 | 0.12 | 0.9  |
| (0.1,0.2,-0.1)  | 0.78 | 0.63 | 0.26 | 0.13 | 0.82 |
| (0.1,0.2,0.1)   | 0.95 | 0.88 | 0.24 | 0.15 | 0.82 |
| (0.1,0.2,0.2)   | 0.8  | 0.74 | 0.46 | 0.12 | 0.9  |
| (0.1,0.2,0.4)   | 0.78 | 0.57 | 0.47 | 0.12 | 0.9  |
| (0.1,0.4,-0.4)  | 0.74 | 0.31 | 0.47 | 0.12 | 0.9  |
| (0.1,0.4,-0.2)  | 0.72 | 0.41 | 0.47 | 0.12 | 0.9  |
| (0.1,0.4,-0.1)  | 0.72 | 0.5  | 0.26 | 0.13 | 0.81 |
| (0.1,0.4,0.1)   | 0.88 | 0.77 | 0.22 | 0.15 | 0.81 |
| (0.1,0.4,0.2)   | 0.8  | 0.63 | 0.47 | 0.12 | 0.9  |
| (0.1,0.4,0.4)   | 0.73 | 0.44 | 0.47 | 0.12 | 0.9  |
| (0.2,-0.4,-0.4) | 0.43 | 0.22 | 0.86 | 0.01 | 1    |
| (0.2,-0.4,-0.2) | 0.47 | 0.35 | 0.85 | 0.01 | 1    |
| (0.2,-0.4,-0.1) | 0.63 | 0.46 | 0.47 | 0.11 | 0.91 |
| (0.2,-0.4,0.1)  | 0.75 | 0.55 | 0.44 | 0.12 | 0.91 |
| (0.2,-0.4,0.2)  | 0.56 | 0.4  | 0.85 | 0.01 | 1    |
| (0.2,-0.4,0.4)  | 0.39 | 0.21 | 0.86 | 0.01 | 1    |
| (0.2,-0.2,-0.4) | 0.75 | 0.38 | 0.85 | 0.01 | 1    |
| (0.2,-0.2,-0.2) | 0.63 | 0.46 | 0.84 | 0.01 | 1    |
| (0.2,-0.2,-0.1) | 0.68 | 0.56 | 0.48 | 0.1  | 0.91 |
| (0.2,-0.2,0.1)  | 0.89 | 0.69 | 0.45 | 0.12 | 0.91 |
| (0.2,-0.2,0.2)  | 0.67 | 0.53 | 0.84 | 0.01 | 1    |
| (0.2,-0.2,0.4)  | 0.54 | 0.33 | 0.85 | 0.01 | 1    |
| (0.2,-0.1,-0.4) | 0.93 | 0.51 | 0.44 | 0.12 | 0.9  |
| (0.2,-0.1,-0.2) | 0.88 | 0.58 | 0.46 | 0.11 | 0.91 |
| (0.2,-0.1,-0.1) | 0.85 | 0.67 | 0.27 | 0.13 | 0.82 |
| (0.2,-0.1,0.1)  | 0.96 | 0.82 | 0.26 | 0.12 | 0.82 |
| (0.2,-0.1,0.2)  | 0.79 | 0.66 | 0.46 | 0.11 | 0.91 |
| (0.2,-0.1,0.4)  | 0.79 | 0.45 | 0.45 | 0.12 | 0.9  |

Tab. 4: Simulation results for scenario 1 (continued)

| $(a, b, c)$     | MCC  | FNC  | PCM  | PIM  | TPR  |
|-----------------|------|------|------|------|------|
| (0.2,0.1,-0.4)  | 0.81 | 0.4  | 0.45 | 0.11 | 0.89 |
| (0.2,0.1,-0.2)  | 0.79 | 0.51 | 0.46 | 0.1  | 0.9  |
| (0.2,0.1,-0.1)  | 0.79 | 0.62 | 0.27 | 0.13 | 0.81 |
| (0.2,0.1,0.1)   | 0.95 | 0.87 | 0.26 | 0.13 | 0.82 |
| (0.2,0.1,0.2)   | 0.85 | 0.72 | 0.46 | 0.1  | 0.9  |
| (0.2,0.1,0.4)   | 0.91 | 0.56 | 0.45 | 0.11 | 0.89 |
| (0.2,0.2,-0.4)  | 0.57 | 0.28 | 0.85 | 0.01 | 1    |
| (0.2,0.2,-0.2)  | 0.51 | 0.39 | 0.84 | 0.01 | 1    |
| (0.2,0.2,-0.1)  | 0.57 | 0.49 | 0.48 | 0.1  | 0.91 |
| (0.2,0.2,0.1)   | 0.87 | 0.76 | 0.45 | 0.12 | 0.91 |
| (0.2,0.2,0.2)   | 0.72 | 0.61 | 0.84 | 0.01 | 1    |
| (0.2,0.2,0.4)   | 0.66 | 0.43 | 0.85 | 0.01 | 1    |
| (0.2,0.4,-0.4)  | 0.39 | 0.15 | 0.86 | 0.01 | 1    |
| (0.2,0.4,-0.2)  | 0.36 | 0.26 | 0.85 | 0.01 | 1    |
| (0.2,0.4,-0.1)  | 0.48 | 0.37 | 0.47 | 0.11 | 0.91 |
| (0.2,0.4,0.1)   | 0.74 | 0.66 | 0.44 | 0.12 | 0.91 |
| (0.2,0.4,0.2)   | 0.66 | 0.51 | 0.85 | 0.01 | 1    |
| (0.2,0.4,0.4)   | 0.39 | 0.3  | 0.85 | 0.01 | 1    |
| (0.4,-0.4,-0.4) | 0.15 | 0.07 | 0.86 | 0.01 | 1    |
| (0.4,-0.4,-0.2) | 0.28 | 0.22 | 0.86 | 0.01 | 1    |
| (0.4,-0.4,-0.1) | 0.44 | 0.35 | 0.47 | 0.11 | 0.91 |
| (0.4,-0.4,0.1)  | 0.54 | 0.45 | 0.44 | 0.12 | 0.91 |
| (0.4,-0.4,0.2)  | 0.35 | 0.29 | 0.86 | 0.01 | 1    |
| (0.4,-0.4,0.4)  | 0.06 | 0.07 | 0.86 | 0.01 | 1    |
| (0.4,-0.2,-0.4) | 0.67 | 0.21 | 0.86 | 0.01 | 1    |
| (0.4,-0.2,-0.2) | 0.53 | 0.31 | 0.85 | 0.01 | 1    |
| (0.4,-0.2,-0.1) | 0.57 | 0.42 | 0.48 | 0.1  | 0.91 |
| (0.4,-0.2,0.1)  | 0.76 | 0.56 | 0.46 | 0.12 | 0.91 |
| (0.4,-0.2,0.2)  | 0.54 | 0.39 | 0.85 | 0.01 | 1    |
| (0.4,-0.2,0.4)  | 0.42 | 0.17 | 0.85 | 0.01 | 1    |
| (0.4,-0.1,-0.4) | 0.93 | 0.35 | 0.42 | 0.12 | 0.89 |
| (0.4,-0.1,-0.2) | 0.88 | 0.44 | 0.43 | 0.12 | 0.9  |
| (0.4,-0.1,-0.1) | 0.83 | 0.53 | 0.25 | 0.13 | 0.81 |
| (0.4,-0.1,0.1)  | 0.91 | 0.69 | 0.24 | 0.12 | 0.81 |
| (0.4,-0.1,0.2)  | 0.74 | 0.52 | 0.43 | 0.12 | 0.9  |
| (0.4,-0.1,0.4)  | 0.74 | 0.29 | 0.42 | 0.12 | 0.9  |
| (0.4,0.1,-0.4)  | 0.75 | 0.24 | 0.42 | 0.11 | 0.89 |
| (0.4,0.1,-0.2)  | 0.73 | 0.36 | 0.43 | 0.11 | 0.89 |
| (0.4,0.1,-0.1)  | 0.73 | 0.48 | 0.26 | 0.13 | 0.81 |
| (0.4,0.1,0.1)   | 0.9  | 0.74 | 0.23 | 0.13 | 0.81 |
| (0.4,0.1,0.2)   | 0.81 | 0.59 | 0.43 | 0.11 | 0.89 |
| (0.4,0.1,0.4)   | 0.9  | 0.4  | 0.42 | 0.11 | 0.88 |
| (0.4,0.2,-0.4)  | 0.46 | 0.11 | 0.85 | 0.01 | 1    |
| (0.4,0.2,-0.2)  | 0.4  | 0.23 | 0.84 | 0.01 | 1    |
| (0.4,0.2,-0.1)  | 0.45 | 0.35 | 0.48 | 0.1  | 0.91 |
| (0.4,0.2,0.1)   | 0.76 | 0.64 | 0.46 | 0.12 | 0.91 |
| (0.4,0.2,0.2)   | 0.61 | 0.47 | 0.84 | 0.01 | 1    |
| (0.4,0.2,0.4)   | 0.57 | 0.27 | 0.85 | 0.01 | 1    |
| (0.4,0.4,-0.4)  | 0    | 0    | 0.86 | 0.01 | 1    |
| (0.4,0.4,-0.2)  | 0.13 | 0.14 | 0.86 | 0.01 | 1    |
| (0.4,0.4,-0.1)  | 0.28 | 0.26 | 0.47 | 0.11 | 0.91 |
| (0.4,0.4,0.1)   | 0.54 | 0.57 | 0.44 | 0.12 | 0.91 |
| (0.4,0.4,0.2)   | 0.47 | 0.41 | 0.86 | 0.01 | 1    |
| (0.4,0.4,0.4)   | 0.18 | 0.17 | 0.86 | 0.01 | 1    |

Tab. 5: Simulation results for scenario 2. We calculate the percentage of correctly selected models (PCM), the percentage of incorrectly selected models (PIM) and the true positive rate (TPR).

| $(a, b, c)$      | MCC  | FNC  | PCM  | PIM  | TPR  |
|------------------|------|------|------|------|------|
| (-0.4,-0.4,-0.4) | 0.08 | 0.09 | 0.83 | 0.01 | 1    |
| (-0.4,-0.4,-0.2) | 0.39 | 0.2  | 0.83 | 0.01 | 1    |
| (-0.4,-0.4,-0.1) | 0.65 | 0.31 | 0.43 | 0.11 | 0.9  |
| (-0.4,-0.4,0.1)  | 0.85 | 0.4  | 0.41 | 0.13 | 0.9  |
| (-0.4,-0.4,0.2)  | 0.57 | 0.25 | 0.83 | 0.01 | 1    |
| (-0.4,-0.4,0.4)  | 0.09 | 0.06 | 0.83 | 0.01 | 1    |
| (-0.4,-0.2,-0.4) | 0.56 | 0.25 | 0.83 | 0.01 | 1    |
| (-0.4,-0.2,-0.2) | 0.46 | 0.33 | 0.83 | 0.01 | 1    |
| (-0.4,-0.2,-0.1) | 0.56 | 0.43 | 0.45 | 0.11 | 0.9  |
| (-0.4,-0.2,0.1)  | 0.88 | 0.56 | 0.42 | 0.12 | 0.9  |
| (-0.4,-0.2,0.2)  | 0.57 | 0.4  | 0.83 | 0.01 | 1    |
| (-0.4,-0.2,0.4)  | 0.34 | 0.2  | 0.83 | 0.01 | 1    |
| (-0.4,-0.1,-0.4) | 0.83 | 0.39 | 0.42 | 0.12 | 0.9  |
| (-0.4,-0.1,-0.2) | 0.76 | 0.46 | 0.44 | 0.11 | 0.9  |
| (-0.4,-0.1,-0.1) | 0.72 | 0.55 | 0.24 | 0.13 | 0.8  |
| (-0.4,-0.1,0.1)  | 0.9  | 0.69 | 0.23 | 0.12 | 0.8  |
| (-0.4,-0.1,0.2)  | 0.64 | 0.54 | 0.44 | 0.11 | 0.9  |
| (-0.4,-0.1,0.4)  | 0.62 | 0.33 | 0.43 | 0.12 | 0.9  |
| (-0.4,0.1,-0.4)  | 0.67 | 0.29 | 0.42 | 0.12 | 0.89 |
| (-0.4,0.1,-0.2)  | 0.67 | 0.4  | 0.44 | 0.12 | 0.89 |
| (-0.4,0.1,-0.1)  | 0.68 | 0.51 | 0.25 | 0.13 | 0.8  |
| (-0.4,0.1,0.1)   | 0.95 | 0.75 | 0.22 | 0.13 | 0.8  |
| (-0.4,0.1,0.2)   | 0.76 | 0.62 | 0.44 | 0.12 | 0.89 |
| (-0.4,0.1,0.4)   | 0.83 | 0.45 | 0.41 | 0.12 | 0.89 |
| (-0.4,0.2,-0.4)  | 0.41 | 0.16 | 0.83 | 0.01 | 1    |
| (-0.4,0.2,-0.2)  | 0.38 | 0.27 | 0.83 | 0.01 | 1    |
| (-0.4,0.2,-0.1)  | 0.46 | 0.37 | 0.45 | 0.11 | 0.9  |
| (-0.4,0.2,0.1)   | 0.98 | 0.64 | 0.42 | 0.12 | 0.9  |
| (-0.4,0.2,0.2)   | 0.67 | 0.5  | 0.83 | 0.01 | 1    |
| (-0.4,0.2,0.4)   | 0.53 | 0.32 | 0.83 | 0.01 | 1    |
| (-0.4,0.4,-0.4)  | 0.04 | 0.02 | 0.83 | 0.01 | 1    |
| (-0.4,0.4,-0.2)  | 0.23 | 0.12 | 0.83 | 0.01 | 1    |
| (-0.4,0.4,-0.1)  | 0.47 | 0.22 | 0.43 | 0.12 | 0.9  |
| (-0.4,0.4,0.1)   | 1    | 0.52 | 0.4  | 0.13 | 0.9  |
| (-0.4,0.4,0.2)   | 0.75 | 0.38 | 0.83 | 0.01 | 1    |
| (-0.4,0.4,0.4)   | 0.23 | 0.17 | 0.83 | 0.01 | 1    |
| (-0.2,-0.4,-0.4) | 0.46 | 0.24 | 0.83 | 0.01 | 1    |
| (-0.2,-0.4,-0.2) | 0.4  | 0.34 | 0.83 | 0.01 | 1    |
| (-0.2,-0.4,-0.1) | 0.61 | 0.45 | 0.45 | 0.11 | 0.9  |
| (-0.2,-0.4,0.1)  | 0.82 | 0.54 | 0.42 | 0.12 | 0.9  |
| (-0.2,-0.4,0.2)  | 0.52 | 0.39 | 0.83 | 0.01 | 1    |
| (-0.2,-0.4,0.4)  | 0.45 | 0.21 | 0.83 | 0.01 | 1    |
| (-0.2,-0.2,-0.4) | 0.52 | 0.4  | 0.83 | 0.01 | 1    |
| (-0.2,-0.2,-0.2) | 0.39 | 0.45 | 0.83 | 0.01 | 1    |
| (-0.2,-0.2,-0.1) | 0.49 | 0.55 | 0.47 | 0.1  | 0.91 |
| (-0.2,-0.2,0.1)  | 0.85 | 0.68 | 0.44 | 0.12 | 0.91 |
| (-0.2,-0.2,0.2)  | 0.5  | 0.52 | 0.83 | 0.01 | 1    |
| (-0.2,-0.2,0.4)  | 0.38 | 0.33 | 0.83 | 0.01 | 1    |
| (-0.2,-0.1,-0.4) | 0.82 | 0.53 | 0.44 | 0.11 | 0.9  |
| (-0.2,-0.1,-0.2) | 0.72 | 0.58 | 0.45 | 0.1  | 0.9  |
| (-0.2,-0.1,-0.1) | 0.68 | 0.67 | 0.25 | 0.12 | 0.82 |
| (-0.2,-0.1,0.1)  | 0.87 | 0.82 | 0.25 | 0.12 | 0.82 |
| (-0.2,-0.1,0.2)  | 0.59 | 0.65 | 0.45 | 0.1  | 0.9  |
| (-0.2,-0.1,0.4)  | 0.58 | 0.46 | 0.44 | 0.11 | 0.9  |

Tab. 6: Simulation results for scenario 2 (continued)

| $(a, b, c)$      | MCC  | FNC  | PCM  | PIM  | TPR  |
|------------------|------|------|------|------|------|
| (-0.2,0.1,-0.4)  | 0.62 | 0.43 | 0.44 | 0.12 | 0.89 |
| (-0.2,0.1,-0.2)  | 0.61 | 0.52 | 0.45 | 0.11 | 0.9  |
| (-0.2,0.1,-0.1)  | 0.62 | 0.62 | 0.27 | 0.12 | 0.81 |
| (-0.2,0.1,0.1)   | 0.94 | 0.87 | 0.24 | 0.12 | 0.81 |
| (-0.2,0.1,0.2)   | 0.7  | 0.73 | 0.46 | 0.11 | 0.9  |
| (-0.2,0.1,0.4)   | 0.79 | 0.58 | 0.44 | 0.12 | 0.89 |
| (-0.2,0.2,-0.4)  | 0.44 | 0.31 | 0.83 | 0.01 | 1    |
| (-0.2,0.2,-0.2)  | 0.36 | 0.39 | 0.83 | 0.01 | 1    |
| (-0.2,0.2,-0.1)  | 0.38 | 0.49 | 0.47 | 0.1  | 0.91 |
| (-0.2,0.2,0.1)   | 0.97 | 0.76 | 0.44 | 0.11 | 0.91 |
| (-0.2,0.2,0.2)   | 0.61 | 0.61 | 0.83 | 0.01 | 1    |
| (-0.2,0.2,0.4)   | 0.46 | 0.44 | 0.83 | 0.01 | 1    |
| (-0.2,0.4,-0.4)  | 0.51 | 0.18 | 0.83 | 0.01 | 1    |
| (-0.2,0.4,-0.2)  | 0.45 | 0.27 | 0.83 | 0.01 | 1    |
| (-0.2,0.4,-0.1)  | 0.42 | 0.36 | 0.45 | 0.11 | 0.9  |
| (-0.2,0.4,0.1)   | 1    | 0.67 | 0.42 | 0.12 | 0.9  |
| (-0.2,0.4,0.2)   | 0.72 | 0.51 | 0.83 | 0.01 | 1    |
| (-0.2,0.4,0.4)   | 0.45 | 0.32 | 0.83 | 0.01 | 1    |
| (-0.1,-0.4,-0.4) | 0.74 | 0.38 | 0.4  | 0.12 | 0.89 |
| (-0.1,-0.4,-0.2) | 0.71 | 0.48 | 0.43 | 0.11 | 0.9  |
| (-0.1,-0.4,-0.1) | 0.7  | 0.58 | 0.25 | 0.12 | 0.8  |
| (-0.1,-0.4,0.1)  | 0.81 | 0.66 | 0.22 | 0.13 | 0.8  |
| (-0.1,-0.4,0.2)  | 0.7  | 0.52 | 0.43 | 0.11 | 0.9  |
| (-0.1,-0.4,0.4)  | 0.74 | 0.35 | 0.41 | 0.12 | 0.89 |
| (-0.1,-0.2,-0.4) | 0.72 | 0.53 | 0.43 | 0.12 | 0.9  |
| (-0.1,-0.2,-0.2) | 0.67 | 0.59 | 0.45 | 0.11 | 0.9  |
| (-0.1,-0.2,-0.1) | 0.66 | 0.68 | 0.27 | 0.12 | 0.81 |
| (-0.1,-0.2,0.1)  | 0.84 | 0.81 | 0.23 | 0.13 | 0.82 |
| (-0.1,-0.2,0.2)  | 0.66 | 0.65 | 0.45 | 0.11 | 0.9  |
| (-0.1,-0.2,0.4)  | 0.7  | 0.47 | 0.43 | 0.11 | 0.9  |
| (-0.1,-0.1,-0.4) | 0.81 | 0.66 | 0.23 | 0.13 | 0.8  |
| (-0.1,-0.1,-0.2) | 0.72 | 0.72 | 0.25 | 0.12 | 0.81 |
| (-0.1,-0.1,-0.1) | 0.67 | 0.8  | 0.15 | 0.1  | 0.72 |
| (-0.1,-0.1,0.1)  | 0.86 | 0.95 | 0.14 | 0.1  | 0.72 |
| (-0.1,-0.1,0.2)  | 0.65 | 0.78 | 0.25 | 0.12 | 0.81 |
| (-0.1,-0.1,0.4)  | 0.69 | 0.6  | 0.23 | 0.13 | 0.8  |
| (-0.1,0.1,-0.4)  | 0.73 | 0.56 | 0.24 | 0.14 | 0.79 |
| (-0.1,0.1,-0.2)  | 0.68 | 0.65 | 0.25 | 0.13 | 0.81 |
| (-0.1,0.1,-0.1)  | 0.66 | 0.75 | 0.16 | 0.12 | 0.72 |
| (-0.1,0.1,0.1)   | 0.93 | 1    | 0.13 | 0.12 | 0.72 |
| (-0.1,0.1,0.2)   | 0.68 | 0.86 | 0.25 | 0.13 | 0.81 |
| (-0.1,0.1,0.4)   | 0.78 | 0.71 | 0.23 | 0.14 | 0.79 |
| (-0.1,0.2,-0.4)  | 0.74 | 0.44 | 0.43 | 0.12 | 0.9  |
| (-0.1,0.2,-0.2)  | 0.7  | 0.52 | 0.45 | 0.11 | 0.9  |
| (-0.1,0.2,-0.1)  | 0.68 | 0.62 | 0.27 | 0.11 | 0.81 |
| (-0.1,0.2,0.1)   | 0.97 | 0.89 | 0.23 | 0.13 | 0.81 |
| (-0.1,0.2,0.2)   | 0.67 | 0.74 | 0.45 | 0.11 | 0.9  |
| (-0.1,0.2,0.4)   | 0.71 | 0.58 | 0.43 | 0.11 | 0.9  |
| (-0.1,0.4,-0.4)  | 0.78 | 0.32 | 0.4  | 0.12 | 0.89 |
| (-0.1,0.4,-0.2)  | 0.75 | 0.41 | 0.44 | 0.12 | 0.9  |
| (-0.1,0.4,-0.1)  | 0.73 | 0.5  | 0.25 | 0.12 | 0.8  |
| (-0.1,0.4,0.1)   | 1    | 0.79 | 0.22 | 0.14 | 0.8  |
| (-0.1,0.4,0.2)   | 0.73 | 0.64 | 0.43 | 0.11 | 0.9  |
| (-0.1,0.4,0.4)   | 0.75 | 0.45 | 0.41 | 0.12 | 0.89 |

Tab. 7: Simulation results for scenario 2 (continued)

| $(a, b, c)$     | MCC  | FNC  | PCM  | PIM  | TPR  |
|-----------------|------|------|------|------|------|
| (0.1,-0.4,-0.4) | 0.74 | 0.38 | 0.42 | 0.1  | 0.9  |
| (0.1,-0.4,-0.2) | 0.7  | 0.47 | 0.44 | 0.1  | 0.91 |
| (0.1,-0.4,-0.1) | 0.69 | 0.58 | 0.24 | 0.11 | 0.81 |
| (0.1,-0.4,0.1)  | 0.81 | 0.66 | 0.23 | 0.12 | 0.81 |
| (0.1,-0.4,0.2)  | 0.69 | 0.51 | 0.44 | 0.1  | 0.91 |
| (0.1,-0.4,0.4)  | 0.71 | 0.34 | 0.42 | 0.1  | 0.9  |
| (0.1,-0.2,-0.4) | 0.7  | 0.52 | 0.44 | 0.1  | 0.91 |
| (0.1,-0.2,-0.2) | 0.65 | 0.58 | 0.46 | 0.09 | 0.91 |
| (0.1,-0.2,-0.1) | 0.62 | 0.67 | 0.26 | 0.1  | 0.82 |
| (0.1,-0.2,0.1)  | 0.84 | 0.8  | 0.25 | 0.12 | 0.82 |
| (0.1,-0.2,0.2)  | 0.62 | 0.63 | 0.46 | 0.09 | 0.91 |
| (0.1,-0.2,0.4)  | 0.66 | 0.45 | 0.44 | 0.1  | 0.91 |
| (0.1,-0.1,-0.4) | 0.82 | 0.65 | 0.24 | 0.12 | 0.81 |
| (0.1,-0.1,-0.2) | 0.73 | 0.71 | 0.25 | 0.12 | 0.81 |
| (0.1,-0.1,-0.1) | 0.68 | 0.79 | 0.15 | 0.11 | 0.72 |
| (0.1,-0.1,0.1)  | 0.86 | 0.93 | 0.14 | 0.11 | 0.73 |
| (0.1,-0.1,0.2)  | 0.59 | 0.77 | 0.25 | 0.12 | 0.81 |
| (0.1,-0.1,0.4)  | 0.64 | 0.58 | 0.24 | 0.13 | 0.81 |
| (0.1,0.1,-0.4)  | 0.69 | 0.54 | 0.23 | 0.12 | 0.8  |
| (0.1,0.1,-0.2)  | 0.62 | 0.62 | 0.25 | 0.11 | 0.81 |
| (0.1,0.1,-0.1)  | 0.6  | 0.72 | 0.15 | 0.11 | 0.72 |
| (0.1,0.1,0.1)   | 0.93 | 0.97 | 0.15 | 0.1  | 0.72 |
| (0.1,0.1,0.2)   | 0.67 | 0.82 | 0.26 | 0.11 | 0.81 |
| (0.1,0.1,0.4)   | 0.77 | 0.67 | 0.23 | 0.12 | 0.8  |
| (0.1,0.2,-0.4)  | 0.69 | 0.42 | 0.44 | 0.1  | 0.91 |
| (0.1,0.2,-0.2)  | 0.64 | 0.49 | 0.46 | 0.09 | 0.91 |
| (0.1,0.2,-0.1)  | 0.61 | 0.59 | 0.26 | 0.11 | 0.82 |
| (0.1,0.2,0.1)   | 0.96 | 0.86 | 0.26 | 0.11 | 0.82 |
| (0.1,0.2,0.2)   | 0.59 | 0.7  | 0.46 | 0.09 | 0.91 |
| (0.1,0.2,0.4)   | 0.64 | 0.54 | 0.44 | 0.09 | 0.91 |
| (0.1,0.4,-0.4)  | 0.72 | 0.28 | 0.42 | 0.1  | 0.9  |
| (0.1,0.4,-0.2)  | 0.68 | 0.37 | 0.44 | 0.1  | 0.91 |
| (0.1,0.4,-0.1)  | 0.66 | 0.46 | 0.24 | 0.11 | 0.81 |
| (0.1,0.4,0.1)   | 1    | 0.76 | 0.23 | 0.12 | 0.81 |
| (0.1,0.4,0.2)   | 0.7  | 0.6  | 0.44 | 0.1  | 0.91 |
| (0.1,0.4,0.4)   | 0.67 | 0.41 | 0.42 | 0.1  | 0.9  |
| (0.2,-0.4,-0.4) | 0.46 | 0.25 | 0.83 | 0.01 | 1    |
| (0.2,-0.4,-0.2) | 0.39 | 0.35 | 0.83 | 0.01 | 1    |
| (0.2,-0.4,-0.1) | 0.62 | 0.45 | 0.45 | 0.11 | 0.9  |
| (0.2,-0.4,0.1)  | 0.82 | 0.53 | 0.42 | 0.12 | 0.9  |
| (0.2,-0.4,0.2)  | 0.51 | 0.39 | 0.83 | 0.01 | 1    |
| (0.2,-0.4,0.4)  | 0.43 | 0.21 | 0.83 | 0.01 | 1    |
| (0.2,-0.2,-0.4) | 0.53 | 0.4  | 0.83 | 0.01 | 1    |
| (0.2,-0.2,-0.2) | 0.41 | 0.46 | 0.83 | 0.01 | 1    |
| (0.2,-0.2,-0.1) | 0.5  | 0.55 | 0.46 | 0.1  | 0.91 |
| (0.2,-0.2,0.1)  | 0.84 | 0.67 | 0.44 | 0.12 | 0.91 |
| (0.2,-0.2,0.2)  | 0.5  | 0.51 | 0.83 | 0.01 | 1    |
| (0.2,-0.2,0.4)  | 0.34 | 0.33 | 0.83 | 0.01 | 1    |
| (0.2,-0.1,-0.4) | 0.83 | 0.53 | 0.44 | 0.11 | 0.9  |
| (0.2,-0.1,-0.2) | 0.74 | 0.58 | 0.45 | 0.1  | 0.91 |
| (0.2,-0.1,-0.1) | 0.7  | 0.67 | 0.26 | 0.12 | 0.82 |
| (0.2,-0.1,0.1)  | 0.87 | 0.81 | 0.25 | 0.12 | 0.82 |
| (0.2,-0.1,0.2)  | 0.61 | 0.64 | 0.45 | 0.1  | 0.91 |
| (0.2,-0.1,0.4)  | 0.6  | 0.45 | 0.44 | 0.11 | 0.9  |

Tab. 8: Simulation results for scenario 2 (continued)

| $(a, b, c)$     | MCC  | FNC  | PCM  | PIM  | TPR  |
|-----------------|------|------|------|------|------|
| (0.2,0.1,-0.4)  | 0.61 | 0.41 | 0.43 | 0.12 | 0.89 |
| (0.2,0.1,-0.2)  | 0.6  | 0.5  | 0.45 | 0.11 | 0.9  |
| (0.2,0.1,-0.1)  | 0.6  | 0.6  | 0.26 | 0.13 | 0.81 |
| (0.2,0.1,0.1)   | 0.93 | 0.84 | 0.24 | 0.12 | 0.81 |
| (0.2,0.1,0.2)   | 0.69 | 0.7  | 0.45 | 0.11 | 0.9  |
| (0.2,0.1,0.4)   | 0.77 | 0.54 | 0.43 | 0.12 | 0.89 |
| (0.2,0.2,-0.4)  | 0.4  | 0.29 | 0.83 | 0.01 | 1    |
| (0.2,0.2,-0.2)  | 0.3  | 0.36 | 0.83 | 0.01 | 1    |
| (0.2,0.2,-0.1)  | 0.39 | 0.46 | 0.47 | 0.1  | 0.91 |
| (0.2,0.2,0.1)   | 0.96 | 0.73 | 0.44 | 0.11 | 0.91 |
| (0.2,0.2,0.2)   | 0.61 | 0.58 | 0.83 | 0.01 | 1    |
| (0.2,0.2,0.4)   | 0.45 | 0.41 | 0.83 | 0.01 | 1    |
| (0.2,0.4,-0.4)  | 0.46 | 0.15 | 0.83 | 0.01 | 1    |
| (0.2,0.4,-0.2)  | 0.38 | 0.24 | 0.83 | 0.01 | 1    |
| (0.2,0.4,-0.1)  | 0.43 | 0.34 | 0.45 | 0.11 | 0.9  |
| (0.2,0.4,0.1)   | 1    | 0.63 | 0.42 | 0.12 | 0.9  |
| (0.2,0.4,0.2)   | 0.71 | 0.48 | 0.83 | 0.01 | 1    |
| (0.2,0.4,0.4)   | 0.38 | 0.28 | 0.83 | 0.01 | 1    |
| (0.4,-0.4,-0.4) | 0.11 | 0.11 | 0.83 | 0.01 | 1    |
| (0.4,-0.4,-0.2) | 0.4  | 0.22 | 0.83 | 0.01 | 1    |
| (0.4,-0.4,-0.1) | 0.67 | 0.33 | 0.43 | 0.11 | 0.9  |
| (0.4,-0.4,0.1)  | 0.84 | 0.4  | 0.41 | 0.13 | 0.9  |
| (0.4,-0.4,0.2)  | 0.57 | 0.26 | 0.83 | 0.01 | 1    |
| (0.4,-0.4,0.4)  | 0.09 | 0.06 | 0.83 | 0.01 | 1    |
| (0.4,-0.2,-0.4) | 0.59 | 0.27 | 0.83 | 0.01 | 1    |
| (0.4,-0.2,-0.2) | 0.49 | 0.35 | 0.83 | 0.01 | 1    |
| (0.4,-0.2,-0.1) | 0.58 | 0.45 | 0.45 | 0.1  | 0.9  |
| (0.4,-0.2,0.1)  | 0.87 | 0.56 | 0.42 | 0.12 | 0.9  |
| (0.4,-0.2,0.2)  | 0.56 | 0.41 | 0.83 | 0.01 | 1    |
| (0.4,-0.2,0.4)  | 0.38 | 0.21 | 0.83 | 0.01 | 1    |
| (0.4,-0.1,-0.4) | 0.86 | 0.4  | 0.42 | 0.12 | 0.9  |
| (0.4,-0.1,-0.2) | 0.79 | 0.48 | 0.44 | 0.11 | 0.9  |
| (0.4,-0.1,-0.1) | 0.76 | 0.57 | 0.24 | 0.13 | 0.8  |
| (0.4,-0.1,0.1)  | 0.89 | 0.7  | 0.23 | 0.12 | 0.8  |
| (0.4,-0.1,0.2)  | 0.68 | 0.54 | 0.44 | 0.11 | 0.9  |
| (0.4,-0.1,0.4)  | 0.66 | 0.34 | 0.42 | 0.12 | 0.9  |
| (0.4,0.1,-0.4)  | 0.65 | 0.27 | 0.42 | 0.13 | 0.89 |
| (0.4,0.1,-0.2)  | 0.65 | 0.39 | 0.44 | 0.12 | 0.89 |
| (0.4,0.1,-0.1)  | 0.66 | 0.5  | 0.25 | 0.13 | 0.8  |
| (0.4,0.1,0.1)   | 0.94 | 0.73 | 0.22 | 0.14 | 0.8  |
| (0.4,0.1,0.2)   | 0.73 | 0.59 | 0.44 | 0.12 | 0.89 |
| (0.4,0.1,0.4)   | 0.8  | 0.42 | 0.41 | 0.12 | 0.89 |
| (0.4,0.2,-0.4)  | 0.39 | 0.15 | 0.83 | 0.01 | 1    |
| (0.4,0.2,-0.2)  | 0.36 | 0.25 | 0.83 | 0.01 | 1    |
| (0.4,0.2,-0.1)  | 0.48 | 0.36 | 0.45 | 0.1  | 0.9  |
| (0.4,0.2,0.1)   | 0.97 | 0.62 | 0.42 | 0.12 | 0.9  |
| (0.4,0.2,0.2)   | 0.66 | 0.47 | 0.83 | 0.01 | 1    |
| (0.4,0.2,0.4)   | 0.51 | 0.29 | 0.83 | 0.01 | 1    |
| (0.4,0.4,-0.4)  | 0    | 0    | 0.83 | 0.01 | 1    |
| (0.4,0.4,-0.2)  | 0.25 | 0.11 | 0.83 | 0.01 | 1    |
| (0.4,0.4,-0.1)  | 0.49 | 0.21 | 0.43 | 0.12 | 0.9  |
| (0.4,0.4,0.1)   | 1    | 0.5  | 0.41 | 0.13 | 0.9  |
| (0.4,0.4,0.2)   | 0.75 | 0.35 | 0.83 | 0.01 | 1    |
| (0.4,0.4,0.4)   | 0.24 | 0.15 | 0.83 | 0.01 | 1    |

Tab. 9: Simulation results for scenario 3. We calculate the percentage of correctly selected models (PCM), the percentage of incorrectly selected models (PIM) and the true positive rate (TPR).

| $(a, b, c)$      | MCC  | FNC  | PCM  | PIM  | TPR  |
|------------------|------|------|------|------|------|
| (-0.4,-0.4,-0.4) | 0.28 | 0.11 | 0.83 | 0.01 | 1    |
| (-0.4,-0.4,-0.2) | 0.52 | 0.31 | 0.82 | 0.01 | 1    |
| (-0.4,-0.4,-0.1) | 0.7  | 0.46 | 0.44 | 0.12 | 0.9  |
| (-0.4,-0.4,0.1)  | 0.55 | 0.33 | 0.43 | 0.12 | 0.91 |
| (-0.4,-0.4,0.2)  | 0.38 | 0.19 | 0.82 | 0.01 | 1    |
| (-0.4,-0.4,0.4)  | 0    | 0.03 | 0.83 | 0.01 | 1    |
| (-0.4,-0.2,-0.4) | 0.66 | 0.31 | 0.82 | 0    | 1    |
| (-0.4,-0.2,-0.2) | 0.6  | 0.46 | 0.81 | 0    | 1    |
| (-0.4,-0.2,-0.1) | 0.81 | 0.61 | 0.45 | 0.11 | 0.91 |
| (-0.4,-0.2,0.1)  | 0.65 | 0.51 | 0.45 | 0.11 | 0.91 |
| (-0.4,-0.2,0.2)  | 0.38 | 0.35 | 0.82 | 0.01 | 1    |
| (-0.4,-0.2,0.4)  | 0.26 | 0.19 | 0.83 | 0.01 | 1    |
| (-0.4,-0.1,-0.4) | 0.84 | 0.47 | 0.44 | 0.1  | 0.91 |
| (-0.4,-0.1,-0.2) | 0.88 | 0.61 | 0.45 | 0.09 | 0.91 |
| (-0.4,-0.1,-0.1) | 0.85 | 0.75 | 0.26 | 0.12 | 0.82 |
| (-0.4,-0.1,0.1)  | 0.68 | 0.67 | 0.28 | 0.11 | 0.82 |
| (-0.4,-0.1,0.2)  | 0.59 | 0.51 | 0.46 | 0.09 | 0.91 |
| (-0.4,-0.1,0.4)  | 0.45 | 0.34 | 0.45 | 0.11 | 0.9  |
| (-0.4,0.1,-0.4)  | 0.68 | 0.33 | 0.42 | 0.14 | 0.9  |
| (-0.4,0.1,-0.2)  | 0.78 | 0.51 | 0.44 | 0.13 | 0.9  |
| (-0.4,0.1,-0.1)  | 0.81 | 0.67 | 0.25 | 0.15 | 0.81 |
| (-0.4,0.1,0.1)   | 0.72 | 0.71 | 0.25 | 0.14 | 0.82 |
| (-0.4,0.1,0.2)   | 0.65 | 0.57 | 0.44 | 0.13 | 0.9  |
| (-0.4,0.1,0.4)   | 0.55 | 0.43 | 0.44 | 0.13 | 0.9  |
| (-0.4,0.2,-0.4)  | 0.5  | 0.18 | 0.83 | 0.01 | 1    |
| (-0.4,0.2,-0.2)  | 0.52 | 0.35 | 0.81 | 0.01 | 1    |
| (-0.4,0.2,-0.1)  | 0.72 | 0.51 | 0.45 | 0.11 | 0.91 |
| (-0.4,0.2,0.1)   | 0.76 | 0.57 | 0.45 | 0.11 | 0.91 |
| (-0.4,0.2,0.2)   | 0.47 | 0.42 | 0.82 | 0.01 | 1    |
| (-0.4,0.2,0.4)   | 0.37 | 0.27 | 0.83 | 0.01 | 1    |
| (-0.4,0.4,-0.4)  | 0.21 | 0.01 | 0.83 | 0.01 | 1    |
| (-0.4,0.4,-0.2)  | 0.38 | 0.18 | 0.83 | 0.01 | 1    |
| (-0.4,0.4,-0.1)  | 0.56 | 0.33 | 0.44 | 0.12 | 0.9  |
| (-0.4,0.4,0.1)   | 0.63 | 0.44 | 0.43 | 0.12 | 0.9  |
| (-0.4,0.4,0.2)   | 0.52 | 0.28 | 0.82 | 0.01 | 1    |
| (-0.4,0.4,0.4)   | 0.12 | 0.1  | 0.84 | 0.01 | 1    |
| (-0.2,-0.4,-0.4) | 0.73 | 0.31 | 0.77 | 0.01 | 0.99 |
| (-0.2,-0.4,-0.2) | 0.72 | 0.48 | 0.7  | 0.03 | 0.97 |
| (-0.2,-0.4,-0.1) | 0.85 | 0.62 | 0.36 | 0.12 | 0.87 |
| (-0.2,-0.4,0.1)  | 0.7  | 0.47 | 0.35 | 0.11 | 0.87 |
| (-0.2,-0.4,0.2)  | 0.56 | 0.32 | 0.7  | 0.03 | 0.97 |
| (-0.2,-0.4,0.4)  | 0.41 | 0.13 | 0.76 | 0.02 | 0.99 |
| (-0.2,-0.2,-0.4) | 0.85 | 0.51 | 0.69 | 0.02 | 0.97 |
| (-0.2,-0.2,-0.2) | 0.85 | 0.64 | 0.58 | 0.05 | 0.95 |
| (-0.2,-0.2,-0.1) | 0.87 | 0.77 | 0.3  | 0.11 | 0.84 |
| (-0.2,-0.2,0.1)  | 0.69 | 0.65 | 0.3  | 0.12 | 0.84 |
| (-0.2,-0.2,0.2)  | 0.6  | 0.49 | 0.59 | 0.06 | 0.94 |
| (-0.2,-0.2,0.4)  | 0.44 | 0.31 | 0.7  | 0.02 | 0.97 |
| (-0.2,-0.1,-0.4) | 0.94 | 0.66 | 0.38 | 0.1  | 0.87 |
| (-0.2,-0.1,-0.2) | 0.88 | 0.79 | 0.31 | 0.1  | 0.85 |
| (-0.2,-0.1,-0.1) | 0.84 | 0.9  | 0.16 | 0.1  | 0.74 |
| (-0.2,-0.1,0.1)  | 0.72 | 0.81 | 0.17 | 0.1  | 0.74 |
| (-0.2,-0.1,0.2)  | 0.67 | 0.65 | 0.31 | 0.1  | 0.84 |
| (-0.2,-0.1,0.4)  | 0.59 | 0.45 | 0.38 | 0.1  | 0.87 |

Tab. 10: Simulation results for scenario 3 (continued)

| $(a, b, c)$      | MCC  | FNC  | PCM  | PIM  | TPR  |
|------------------|------|------|------|------|------|
| (-0.2,0.1,-0.4)  | 0.85 | 0.53 | 0.35 | 0.13 | 0.86 |
| (-0.2,0.1,-0.2)  | 0.86 | 0.69 | 0.3  | 0.12 | 0.84 |
| (-0.2,0.1,-0.1)  | 0.85 | 0.83 | 0.15 | 0.13 | 0.73 |
| (-0.2,0.1,0.1)   | 0.75 | 0.85 | 0.15 | 0.11 | 0.73 |
| (-0.2,0.1,0.2)   | 0.71 | 0.7  | 0.3  | 0.13 | 0.83 |
| (-0.2,0.1,0.4)   | 0.69 | 0.54 | 0.36 | 0.12 | 0.86 |
| (-0.2,0.2,-0.4)  | 0.83 | 0.39 | 0.71 | 0.03 | 0.97 |
| (-0.2,0.2,-0.2)  | 0.85 | 0.54 | 0.6  | 0.06 | 0.95 |
| (-0.2,0.2,-0.1)  | 0.84 | 0.68 | 0.3  | 0.12 | 0.84 |
| (-0.2,0.2,0.1)   | 0.78 | 0.72 | 0.29 | 0.11 | 0.84 |
| (-0.2,0.2,0.2)   | 0.62 | 0.56 | 0.59 | 0.05 | 0.94 |
| (-0.2,0.2,0.4)   | 0.5  | 0.4  | 0.7  | 0.03 | 0.97 |
| (-0.2,0.4,-0.4)  | 0.69 | 0.21 | 0.77 | 0.01 | 0.98 |
| (-0.2,0.4,-0.2)  | 0.7  | 0.37 | 0.71 | 0.04 | 0.97 |
| (-0.2,0.4,-0.1)  | 0.73 | 0.5  | 0.37 | 0.13 | 0.87 |
| (-0.2,0.4,0.1)   | 0.8  | 0.58 | 0.36 | 0.11 | 0.87 |
| (-0.2,0.4,0.2)   | 0.62 | 0.42 | 0.69 | 0.03 | 0.97 |
| (-0.2,0.4,0.4)   | 0.45 | 0.22 | 0.77 | 0.01 | 0.98 |
| (-0.1,-0.4,-0.4) | 0.97 | 0.47 | 0.18 | 0.28 | 0.79 |
| (-0.1,-0.4,-0.2) | 0.94 | 0.61 | 0.12 | 0.37 | 0.77 |
| (-0.1,-0.4,-0.1) | 0.92 | 0.73 | 0.05 | 0.29 | 0.66 |
| (-0.1,-0.4,0.1)  | 0.81 | 0.58 | 0.06 | 0.28 | 0.67 |
| (-0.1,-0.4,0.2)  | 0.76 | 0.44 | 0.13 | 0.37 | 0.77 |
| (-0.1,-0.4,0.4)  | 0.66 | 0.25 | 0.2  | 0.3  | 0.8  |
| (-0.1,-0.2,-0.4) | 0.99 | 0.65 | 0.12 | 0.36 | 0.77 |
| (-0.1,-0.2,-0.2) | 0.95 | 0.76 | 0.08 | 0.47 | 0.73 |
| (-0.1,-0.2,-0.1) | 0.92 | 0.87 | 0.04 | 0.36 | 0.64 |
| (-0.1,-0.2,0.1)  | 0.84 | 0.75 | 0.04 | 0.34 | 0.64 |
| (-0.1,-0.2,0.2)  | 0.78 | 0.59 | 0.08 | 0.46 | 0.74 |
| (-0.1,-0.2,0.4)  | 0.68 | 0.41 | 0.14 | 0.38 | 0.78 |
| (-0.1,-0.1,-0.4) | 1    | 0.79 | 0.06 | 0.27 | 0.66 |
| (-0.1,-0.1,-0.2) | 0.95 | 0.89 | 0.04 | 0.34 | 0.64 |
| (-0.1,-0.1,-0.1) | 0.93 | 1    | 0.02 | 0.27 | 0.54 |
| (-0.1,-0.1,0.1)  | 0.84 | 0.9  | 0.02 | 0.24 | 0.55 |
| (-0.1,-0.1,0.2)  | 0.79 | 0.74 | 0.04 | 0.33 | 0.64 |
| (-0.1,-0.1,0.4)  | 0.68 | 0.54 | 0.07 | 0.27 | 0.67 |
| (-0.1,0.1,-0.4)  | 1    | 0.67 | 0.07 | 0.27 | 0.65 |
| (-0.1,0.1,-0.2)  | 0.95 | 0.8  | 0.04 | 0.36 | 0.64 |
| (-0.1,0.1,-0.1)  | 0.93 | 0.93 | 0.02 | 0.28 | 0.53 |
| (-0.1,0.1,0.1)   | 0.85 | 0.93 | 0.02 | 0.26 | 0.54 |
| (-0.1,0.1,0.2)   | 0.8  | 0.79 | 0.05 | 0.36 | 0.63 |
| (-0.1,0.1,0.4)   | 0.78 | 0.64 | 0.07 | 0.28 | 0.66 |
| (-0.1,0.2,-0.4)  | 1    | 0.54 | 0.15 | 0.38 | 0.77 |
| (-0.1,0.2,-0.2)  | 0.96 | 0.66 | 0.09 | 0.48 | 0.74 |
| (-0.1,0.2,-0.1)  | 0.93 | 0.79 | 0.04 | 0.36 | 0.64 |
| (-0.1,0.2,0.1)   | 0.85 | 0.81 | 0.05 | 0.34 | 0.64 |
| (-0.1,0.2,0.2)   | 0.79 | 0.66 | 0.1  | 0.46 | 0.74 |
| (-0.1,0.2,0.4)   | 0.69 | 0.5  | 0.15 | 0.36 | 0.77 |
| (-0.1,0.4,-0.4)  | 0.96 | 0.37 | 0.19 | 0.3  | 0.8  |
| (-0.1,0.4,-0.2)  | 0.95 | 0.51 | 0.14 | 0.38 | 0.76 |
| (-0.1,0.4,-0.1)  | 0.92 | 0.62 | 0.06 | 0.29 | 0.66 |
| (-0.1,0.4,0.1)   | 0.87 | 0.69 | 0.06 | 0.27 | 0.67 |
| (-0.1,0.4,0.2)   | 0.78 | 0.54 | 0.14 | 0.35 | 0.77 |
| (-0.1,0.4,0.4)   | 0.69 | 0.34 | 0.2  | 0.28 | 0.8  |

Tab. 11: Simulation results for scenario 3 (continued)

| $(a, b, c)$     | MCC  | FNC  | PCM  | PIM  | TPR  |
|-----------------|------|------|------|------|------|
| (0.1,-0.4,-0.4) | 0.67 | 0.32 | 0.22 | 0.26 | 0.81 |
| (0.1,-0.4,-0.2) | 0.76 | 0.53 | 0.14 | 0.34 | 0.78 |
| (0.1,-0.4,-0.1) | 0.87 | 0.68 | 0.07 | 0.26 | 0.67 |
| (0.1,-0.4,0.1)  | 0.9  | 0.6  | 0.07 | 0.28 | 0.67 |
| (0.1,-0.4,0.2)  | 0.93 | 0.48 | 0.15 | 0.37 | 0.77 |
| (0.1,-0.4,0.4)  | 0.95 | 0.36 | 0.22 | 0.28 | 0.8  |
| (0.1,-0.2,-0.4) | 0.67 | 0.49 | 0.14 | 0.34 | 0.78 |
| (0.1,-0.2,-0.2) | 0.77 | 0.66 | 0.08 | 0.44 | 0.75 |
| (0.1,-0.2,-0.1) | 0.82 | 0.81 | 0.04 | 0.32 | 0.65 |
| (0.1,-0.2,0.1)  | 0.92 | 0.77 | 0.05 | 0.34 | 0.65 |
| (0.1,-0.2,0.2)  | 0.96 | 0.65 | 0.12 | 0.46 | 0.74 |
| (0.1,-0.2,0.4)  | 0.97 | 0.52 | 0.15 | 0.37 | 0.78 |
| (0.1,-0.1,-0.4) | 0.8  | 0.64 | 0.06 | 0.26 | 0.68 |
| (0.1,-0.1,-0.2) | 0.78 | 0.79 | 0.04 | 0.33 | 0.65 |
| (0.1,-0.1,-0.1) | 0.82 | 0.94 | 0.02 | 0.24 | 0.54 |
| (0.1,-0.1,0.1)  | 0.92 | 0.92 | 0.03 | 0.26 | 0.55 |
| (0.1,-0.1,0.2)  | 0.95 | 0.79 | 0.06 | 0.34 | 0.65 |
| (0.1,-0.1,0.4)  | 0.98 | 0.66 | 0.07 | 0.28 | 0.67 |
| (0.1,0.1,-0.4)  | 0.66 | 0.51 | 0.06 | 0.26 | 0.67 |
| (0.1,0.1,-0.2)  | 0.76 | 0.7  | 0.04 | 0.34 | 0.64 |
| (0.1,0.1,-0.1)  | 0.81 | 0.86 | 0.03 | 0.26 | 0.54 |
| (0.1,0.1,0.1)   | 0.91 | 0.95 | 0.02 | 0.25 | 0.55 |
| (0.1,0.1,0.2)   | 0.95 | 0.84 | 0.05 | 0.36 | 0.64 |
| (0.1,0.1,0.4)   | 0.98 | 0.74 | 0.08 | 0.3  | 0.66 |
| (0.1,0.2,-0.4)  | 0.65 | 0.37 | 0.13 | 0.35 | 0.78 |
| (0.1,0.2,-0.2)  | 0.75 | 0.56 | 0.08 | 0.45 | 0.74 |
| (0.1,0.2,-0.1)  | 0.81 | 0.72 | 0.05 | 0.34 | 0.64 |
| (0.1,0.2,0.1)   | 0.9  | 0.82 | 0.05 | 0.36 | 0.65 |
| (0.1,0.2,0.2)   | 0.95 | 0.71 | 0.1  | 0.48 | 0.75 |
| (0.1,0.2,0.4)   | 0.98 | 0.61 | 0.14 | 0.38 | 0.77 |
| (0.1,0.4,-0.4)  | 0.64 | 0.22 | 0.19 | 0.28 | 0.81 |
| (0.1,0.4,-0.2)  | 0.73 | 0.41 | 0.14 | 0.36 | 0.78 |
| (0.1,0.4,-0.1)  | 0.78 | 0.56 | 0.06 | 0.28 | 0.67 |
| (0.1,0.4,0.1)   | 0.89 | 0.7  | 0.06 | 0.28 | 0.67 |
| (0.1,0.4,0.2)   | 0.92 | 0.58 | 0.14 | 0.37 | 0.77 |
| (0.1,0.4,0.4)   | 0.95 | 0.44 | 0.2  | 0.29 | 0.8  |
| (0.2,-0.4,-0.4) | 0.43 | 0.21 | 0.78 | 0.01 | 0.99 |
| (0.2,-0.4,-0.2) | 0.63 | 0.42 | 0.71 | 0.02 | 0.98 |
| (0.2,-0.4,-0.1) | 0.81 | 0.58 | 0.38 | 0.11 | 0.88 |
| (0.2,-0.4,0.1)  | 0.72 | 0.47 | 0.37 | 0.12 | 0.88 |
| (0.2,-0.4,0.2)  | 0.69 | 0.35 | 0.71 | 0.03 | 0.98 |
| (0.2,-0.4,0.4)  | 0.68 | 0.19 | 0.77 | 0.02 | 0.99 |
| (0.2,-0.2,-0.4) | 0.53 | 0.4  | 0.71 | 0.02 | 0.98 |
| (0.2,-0.2,-0.2) | 0.6  | 0.56 | 0.6  | 0.04 | 0.95 |
| (0.2,-0.2,-0.1) | 0.79 | 0.72 | 0.32 | 0.1  | 0.85 |
| (0.2,-0.2,0.1)  | 0.81 | 0.66 | 0.3  | 0.11 | 0.85 |
| (0.2,-0.2,0.2)  | 0.82 | 0.53 | 0.6  | 0.04 | 0.95 |
| (0.2,-0.2,0.4)  | 0.81 | 0.38 | 0.72 | 0.02 | 0.98 |
| (0.2,-0.1,-0.4) | 0.72 | 0.55 | 0.36 | 0.1  | 0.88 |
| (0.2,-0.1,-0.2) | 0.75 | 0.71 | 0.31 | 0.1  | 0.85 |
| (0.2,-0.1,-0.1) | 0.76 | 0.85 | 0.17 | 0.1  | 0.75 |
| (0.2,-0.1,0.1)  | 0.82 | 0.82 | 0.16 | 0.1  | 0.75 |
| (0.2,-0.1,0.2)  | 0.83 | 0.68 | 0.31 | 0.1  | 0.85 |
| (0.2,-0.1,0.4)  | 0.83 | 0.52 | 0.37 | 0.1  | 0.88 |

Tab. 12: Simulation results for scenario 3 (continued)

| $(a, b, c)$     | MCC  | FNC  | PCM  | PIM  | TPR  |
|-----------------|------|------|------|------|------|
| (0.2,0.1,-0.4)  | 0.56 | 0.41 | 0.35 | 0.13 | 0.87 |
| (0.2,0.1,-0.2)  | 0.64 | 0.61 | 0.31 | 0.13 | 0.84 |
| (0.2,0.1,-0.1)  | 0.72 | 0.78 | 0.17 | 0.14 | 0.74 |
| (0.2,0.1,0.1)   | 0.83 | 0.85 | 0.16 | 0.12 | 0.74 |
| (0.2,0.1,0.2)   | 0.85 | 0.74 | 0.3  | 0.12 | 0.84 |
| (0.2,0.1,0.4)   | 0.91 | 0.62 | 0.35 | 0.12 | 0.87 |
| (0.2,0.2,-0.4)  | 0.42 | 0.27 | 0.71 | 0.03 | 0.98 |
| (0.2,0.2,-0.2)  | 0.58 | 0.46 | 0.59 | 0.05 | 0.95 |
| (0.2,0.2,-0.1)  | 0.71 | 0.62 | 0.32 | 0.12 | 0.85 |
| (0.2,0.2,0.1)   | 0.86 | 0.72 | 0.3  | 0.11 | 0.85 |
| (0.2,0.2,0.2)   | 0.82 | 0.6  | 0.59 | 0.04 | 0.95 |
| (0.2,0.2,0.4)   | 0.82 | 0.47 | 0.71 | 0.02 | 0.98 |
| (0.2,0.4,-0.4)  | 0.39 | 0.11 | 0.78 | 0.02 | 0.99 |
| (0.2,0.4,-0.2)  | 0.54 | 0.3  | 0.72 | 0.03 | 0.98 |
| (0.2,0.4,-0.1)  | 0.71 | 0.45 | 0.37 | 0.12 | 0.87 |
| (0.2,0.4,0.1)   | 0.84 | 0.58 | 0.35 | 0.12 | 0.88 |
| (0.2,0.4,0.2)   | 0.68 | 0.45 | 0.71 | 0.03 | 0.98 |
| (0.2,0.4,0.4)   | 0.69 | 0.28 | 0.79 | 0.01 | 0.99 |
| (0.4,-0.4,-0.4) | 0.12 | 0.09 | 0.83 | 0.01 | 1    |
| (0.4,-0.4,-0.2) | 0.54 | 0.28 | 0.82 | 0.01 | 1    |
| (0.4,-0.4,-0.1) | 0.65 | 0.44 | 0.44 | 0.12 | 0.9  |
| (0.4,-0.4,0.1)  | 0.56 | 0.31 | 0.43 | 0.12 | 0.91 |
| (0.4,-0.4,0.2)  | 0.38 | 0.17 | 0.82 | 0.01 | 1    |
| (0.4,-0.4,0.4)  | 0.21 | 0    | 0.83 | 0.01 | 1    |
| (0.4,-0.2,-0.4) | 0.4  | 0.28 | 0.82 | 0    | 1    |
| (0.4,-0.2,-0.2) | 0.48 | 0.43 | 0.82 | 0    | 1    |
| (0.4,-0.2,-0.1) | 0.77 | 0.58 | 0.45 | 0.11 | 0.91 |
| (0.4,-0.2,0.1)  | 0.72 | 0.5  | 0.45 | 0.11 | 0.91 |
| (0.4,-0.2,0.2)  | 0.52 | 0.34 | 0.82 | 0.01 | 1    |
| (0.4,-0.2,0.4)  | 0.52 | 0.18 | 0.83 | 0.01 | 1    |
| (0.4,-0.1,-0.4) | 0.59 | 0.45 | 0.44 | 0.1  | 0.91 |
| (0.4,-0.1,-0.2) | 0.68 | 0.58 | 0.45 | 0.09 | 0.91 |
| (0.4,-0.1,-0.1) | 0.74 | 0.72 | 0.26 | 0.12 | 0.82 |
| (0.4,-0.1,0.1)  | 0.81 | 0.67 | 0.28 | 0.11 | 0.82 |
| (0.4,-0.1,0.2)  | 0.81 | 0.51 | 0.46 | 0.09 | 0.91 |
| (0.4,-0.1,0.4)  | 0.71 | 0.33 | 0.45 | 0.11 | 0.9  |
| (0.4,0.1,-0.4)  | 0.43 | 0.3  | 0.42 | 0.14 | 0.9  |
| (0.4,0.1,-0.2)  | 0.57 | 0.48 | 0.44 | 0.13 | 0.9  |
| (0.4,0.1,-0.1)  | 0.68 | 0.64 | 0.25 | 0.15 | 0.81 |
| (0.4,0.1,0.1)   | 0.84 | 0.7  | 0.25 | 0.14 | 0.82 |
| (0.4,0.1,0.2)   | 0.85 | 0.57 | 0.45 | 0.13 | 0.9  |
| (0.4,0.1,0.4)   | 0.82 | 0.43 | 0.44 | 0.13 | 0.9  |
| (0.4,0.2,-0.4)  | 0.25 | 0.16 | 0.83 | 0.01 | 1    |
| (0.4,0.2,-0.2)  | 0.39 | 0.33 | 0.81 | 0.01 | 1    |
| (0.4,0.2,-0.1)  | 0.67 | 0.49 | 0.45 | 0.11 | 0.91 |
| (0.4,0.2,0.1)   | 0.79 | 0.56 | 0.45 | 0.11 | 0.91 |
| (0.4,0.2,0.2)   | 0.59 | 0.42 | 0.82 | 0.01 | 1    |
| (0.4,0.2,0.4)   | 0.64 | 0.27 | 0.83 | 0.01 | 1    |
| (0.4,0.4,-0.4)  | 0    | 0.02 | 0.83 | 0.01 | 1    |
| (0.4,0.4,-0.2)  | 0.39 | 0.18 | 0.83 | 0.01 | 1    |
| (0.4,0.4,-0.1)  | 0.56 | 0.32 | 0.44 | 0.12 | 0.9  |
| (0.4,0.4,0.1)   | 0.68 | 0.44 | 0.43 | 0.12 | 0.9  |
| (0.4,0.4,0.2)   | 0.5  | 0.28 | 0.82 | 0.01 | 1    |
| (0.4,0.4,0.4)   | 0.25 | 0.09 | 0.84 | 0.01 | 1    |
